# Supplementary material for: Troponoid-mediated radical polymerization in aqueous medium
Source: Royal Society of Chemistry journal article supplement (doi:10.1039/d5py00620a), 2025-01-01
Supplement: d5py00620a1.pdf [file d5py00620a1.pdf]

## Electronic Supporting Information

### Troponoid-Mediated Radical Polymerization in Aqueous Medium

I-Hsiang Chang,<sup>1</sup> Ting-Yu Lin,<sup>1</sup> Po-Tsun Lai,<sup>1</sup> Edeline Clarissa Adhidjaja,<sup>2</sup> and Chi-How Peng\*<sup>1,3</sup>

<sup>1</sup>Department of Chemistry, National Tsing Hua University, Hsinchu 30013, Taiwan.

<sup>2</sup>Department of Microbiology, School of Life Science and Technology, Institut Teknologi Bandung, Bandung 40132, Indonesia.

<sup>3</sup>Department of Chemistry, National Taiwan University, Taipei City 10617, Taiwan.

**Keywords:** Reversible-Deactivation Radical Polymerization, Troponoid-Mediated Radical Polymerization, Water-Soluble Control Agent, Organo-mediator, Aqueous Medium

## Table of contents

|                                                                                                              |    |
|--------------------------------------------------------------------------------------------------------------|----|
| 1. Materials.....                                                                                            | 3  |
| 2. Characterization .....                                                                                    | 3  |
| 3. General procedure for polymerization in aqueous .....                                                     | 4  |
| 4. Synthesis of PVP- <i>b</i> -PVP block copolymer for chain extension .....                                 | 5  |
| 5. Synthesis of PHEA- <i>b</i> -PHEA block copolymer for chain extension.....                                | 5  |
| 6. Synthesis of PDMA- <i>b</i> -PDMA block copolymer for chain extension.....                                | 6  |
| 7. Synthesis of PDMA- <i>b</i> -PVP block copolymer.....                                                     | 6  |
| 8. Synthesis of PHEA- <i>b</i> -PVP block copolymer.....                                                     | 6  |
| 9. The first-order kinetic plots and GPC traces for the <i>NVP</i> polymerizations mediated by TP-OH .....   | 7  |
| 10. The control study for the <i>NVP</i> polymerization .....                                                | 9  |
| 11. First-order kinetic plots for the monomer scopes in the TP mediated radical aqueous polymerization ..... | 11 |
| 12. GPC traces for the chain extension of DMA and HEA polymerization mediated by TP 11                       |    |
| 13. Model reaction for the mechanism study .....                                                             | 12 |
| 14. Kinetic simulation .....                                                                                 | 17 |
| 15. References .....                                                                                         | 19 |

## 1. Materials

Dichloromethane was refluxed at least 24 hours  $\text{CaH}_2$  to remove water and purchased from ACROS. *N*-vinylpyrrolidone (NVP, Acros, 99%) was distilled under reduced pressure and degassed by three freeze–pump–thaw cycles. 2-Hydroxyethyl acrylate (HEA, Acros, 97%) was dissolved in water (25% by volume), and the solution was extracted 10 times with hexane to remove diacrylates. *N*, *N*-Dimethylacrylamide (DMA, TCI, 99%) was passed through the basic  $\text{Al}_2\text{O}_3$  to remove the inhibitor before use. Hydrochloric acid (SHOWA), diethyl ether (Echo Chemical Co., Ltd, 99%), *n*-hexane (Seed chem, 95%), diethylamine (Alfa Aesar, 99%), tropone (**TP**, Alfa Aesar, 97%), tropolone (**TP-OH**, TCI, 98%), 2-methoxytropone (**TP-OMe**, TCI, 98%), 2-chlorotropone (**TP-Cl**, Aldrich, > 98%), 2,2'-Azobis[2-(2-imidazolin-2-yl)propane]dihydrochloride (VA-044, TCI, 98%), 4,4'-Azobis(4-cyanovaleric acid) (V-501, Alfa Aesar, 98%), 2,2'-azobisisobutyronitrile (AIBN, Otsuka chemical, 99%) and deuterated solvents (Aldrich) were used as received without any purification. The water used in all the experiments was purified by a Milli-Q system (Merck) with a resistivity of 18 M $\Omega$  cm.

## 2. Characterization

NMR spectroscopy was used to characterize the structures of all chemicals and monomer conversion. The spectrum was recorded by Bruker Avance III HD 400 MHz, 500 MHz, and 800 MHz spectrometers at 298 K. The chemical shifts in  $^1\text{H}$  NMR were shown in ppm referring to residual solvent in  $\text{CDCl}_3$  as  $\delta$  7.24 ppm,  $\text{D}_2\text{O}$  as  $\delta$  4.79 ppm, and  $\text{DMSO-}d_6$  as  $\delta$  2.50 ppm.  $^{13}\text{C}$  NMR chemical shifts are given in ppm refer to residual solvent in  $\text{CDCl}_3$  as  $\delta$  77 ppm. Polymeric products of poly(*N*-vinylpyrrolidone), poly(*N*, *N*-dimethylacrylamide) and poly(2-hydroxyethyl acrylate)

were characterized by Gel permeation chromatography (GPC) system equipped with Ultimate 3000 liquid chromatograph associated with a 101 refractive index (RI) detector and three Waters columns (Styragel® HR 2 DMF, Styragel® HR 4 DMF, and Styragel® HR 5 DMF) using DMF-LiBr (0.1 M) as the eluent at 80 °C with a flow rate of 1 ml/min. The calibration was based on linear poly(methyl methacrylate) (PMMA) with molecular weights 1810, 4760, 9720, 30780, 72800, 146500, 260900, and 675500 g/mol with a narrow polydispersity ( $\bar{D} = 1.01\sim 1.05$ ). The number-averaged molecular weight ( $M_n$ ), weight-averaged molecular weight ( $M_w$ ), and polydispersity index ( $\bar{D}$ ) of the polymeric products were obtained using DIONEX chromeleon software. Poly(acrylic acid) was characterized by GPC equipped with Agilent columns (PL aquagel-OH 20 and PL aquagel-OH 30) using a neutral solution containing NaNO<sub>3</sub> (0.2 M) and NaH<sub>2</sub>PO<sub>4</sub> (0.01 M) as the eluent at 30 °C with a flow rate equal of 1 mL/min. The calibration was based on linear poly(acrylic acid) as standard ranging in molecular weight from  $1.25 \times 10^3$  g/mol to  $3.92 \times 10^5$  g/mol with a narrow polydispersity ( $\bar{D} = 1.01\sim 1.05$ ). The  $M_n$ ,  $M_w$ , and polydispersity ( $\bar{D}$ ) of the polymeric products were calculated by DIONEX chromeleon software. UV-vis spectra were recorded by SHIMADZU UV-1800 instrument from 1100 to 190 nm with a double beam photometer and blank solution. Mass measurements were measured by Bruker Autoflex Speed and micrOTOF-Q II with an electrospray ionization (ESI) ion source.

### **3. General procedure for polymerization in aqueous**

The mediator and VA-044 were placed in a 50 ml Schlenk flask and cycled three times with vacuum/nitrogen to remove oxygen. Deoxygenated deionized water and dried monomer were then added using a syringe under nitrogen. The mixture was stirred and heated to 40 °C to initiate the polymerization process. A small portion of the

polymerization mixture was extracted to measure the monomer conversion, molecular weight, and polydispersity using  $^1\text{H}$  NMR spectroscopy and GPC system. The procedure for polymerizing 2-hydroxyethyl acrylate and *N,N*-Dimethylacrylamide was the same.

#### **4. Synthesis of PVP-*b*-PVP block copolymer for chain extension**

Macroinitiators of PVP-tropone were prepared by the *NVP* polymerization mediated by tropone under the conditions of  $[\text{TP}]_0/[\text{AIBN}]_0/[\text{NVP}]_0 = 1/10/200$  in bulk at 60 °C. Unreacted monomers and AIBN were extracted by deoxygenated diethyl ether. The macroinitiators were characterized using  $^1\text{H}$  NMR spectrum and GPC to confirm the conversion and molecular weight. The flask containing macroinitiators was then purged with nitrogen, after which deoxygenated *NVP* monomer was added. The mixture was stirred and heated at 60 °C to start the polymerization.

#### **5. Synthesis of PHEA-*b*-PHEA block copolymer for chain extension**

Macroinitiators of PHEA-tropone were prepared by the HEA polymerization mediated by tropone under the conditions of  $[\text{TP}]_0/[\text{VA-044}]_0/[\text{HEA}]_0 = 1/5/200$ ,  $[\text{HEA}]_0 = 1.93 \text{ M}$ , in deionized water at 40 °C. Unreacted monomers and water were removed under vacuum. The macroinitiators were characterized using  $^1\text{H}$  NMR spectra and GPC to confirm the conversion and molecular weight. The flask containing macroinitiators was then purged with nitrogen, and then water and HEA ( $[\text{HEA}]_0 = 1.93 \text{ M}$ ) solution treated with three cycles of freeze-pump-thaw process in another schlenk flask were injected into the reaction. The mixture was stirred and heated at 40 °C to start the polymerization.

## 6. Synthesis of PDMA-*b*-PDMA block copolymer for chain extension

Macroinitiators of PDMA-tropone were prepared by the DMA polymerization mediated by tropone under the conditions of  $[\text{TP}]_0/[\text{VA-044}]_0/[\text{DMA}]_0 = 1/5/200$ ,  $[\text{DMA}]_0 = 2.15 \text{ M}$ , in deionized water at  $40^\circ\text{C}$ . Unreacted monomers and water were removed under vacuum. The macroinitiators were characterized using  $^1\text{H}$  NMR spectrum and GPC to confirm the conversion and molecular weight. The flask containing macroinitiators was then purged with nitrogen, and then water and DMA ( $[\text{DMA}]_0 = 2.15 \text{ M}$ ) solution treated with three cycles of freeze-pump-thaw process in another schlenk flask were injected into the reaction. The mixture was stirred and heated at  $40^\circ\text{C}$  to start the polymerization.

## 7. Synthesis of PDMA-*b*-PVP block copolymer

Macroinitiators of PDMA-tropone were prepared by the DMA polymerization mediated by tropone under the conditions of  $[\text{TP}]_0/[\text{VA-044}]_0/[\text{DMA}]_0 = 1/5/200$ ,  $[\text{DMA}]_0 = 2.15 \text{ M}$ , in deionized water at  $40^\circ\text{C}$ . Unreacted monomers and water were removed under vacuum. The macroinitiators were characterized using  $^1\text{H}$  NMR spectrum and GPC to confirm the conversion and molecular weight. The flask containing macroinitiators was then purged with nitrogen, and then water and NVP ( $[\text{NVP}]_0 = 4.68 \text{ M}$ ) solution treated with three cycles of freeze-pump-thaw process in another schlenk flask were injected into the reaction. The mixture was stirred and heated at  $40^\circ\text{C}$  to start the polymerization.

## 8. Synthesis of PHEA-*b*-PVP block copolymer

Macroinitiators of PHEA-tropone were prepared by the HEA polymerization

mediated by tropone under the conditions of  $[\text{TP}]_0/[\text{VA-044}]_0/[\text{HEA}]_0 = 1/5/200$ ,  $[\text{HEA}]_0 = 1.93 \text{ M}$ , in deionized water at  $40^\circ\text{C}$ . Unreacted monomers and water were removed under vacuum. The macroinitiators were characterized using  $^1\text{H}$  NMR spectrum and GPC to confirm the conversion and molecular weight. The flask containing macroinitiators was then purged with nitrogen, and then water and NVP ( $[\text{NVP}]_0 = 4.68 \text{ M}$ ) solution treated with three cycles of freeze-pump-thaw process in another schlenk flask were injected into the reaction. The mixture was stirred and heated at  $40^\circ\text{C}$  to start the polymerization.

## 9. The first-order kinetic plots and GPC traces for the NVP polymerizations mediated by TP-OH

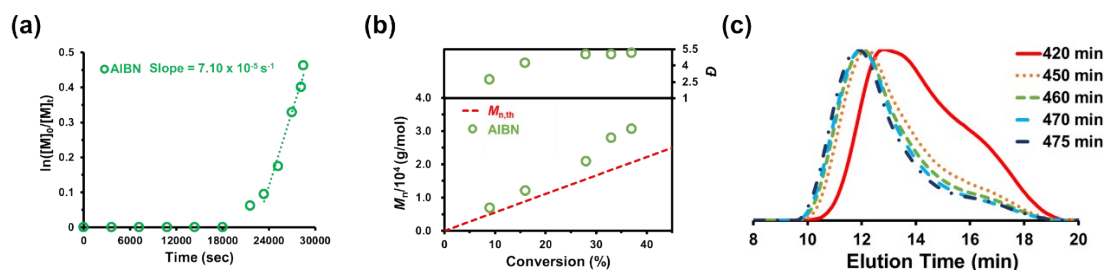

**Figure S1** The NVP polymerizations mediated by TP-OH with AIBN as an initiator under the condition of  $[\text{TP-OH}]_0/[\text{AIBN}]_0/[\text{NVP}]_0 = 1/10/500$ ,  $[\text{NVP}] = 4.68 \text{ M}$  in DI water at  $60^\circ\text{C}$ . (a) The first-order kinetic plots. (b) The plots of  $M_n$  and  $\bar{D}$  versus NVP conversion. (c) The GPC traces of NVP polymerization.

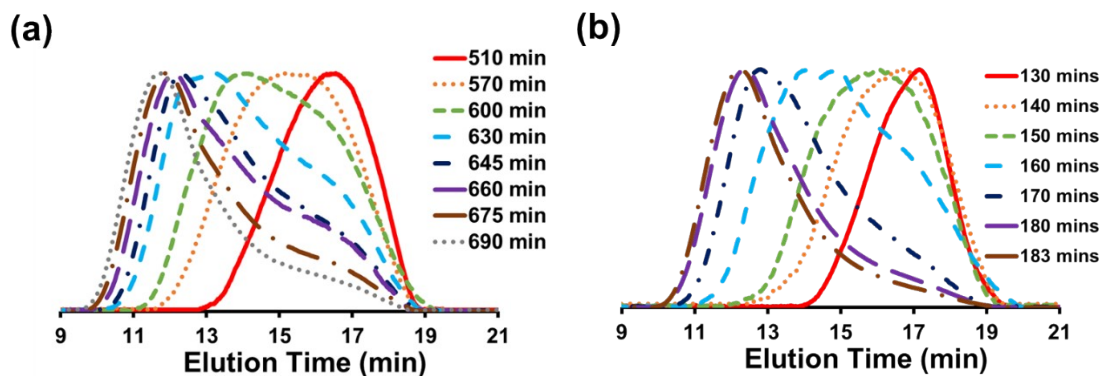

**Figure S2** The GPC traces of *NVP* polymerization mediated by **TP-OH** under the condition of  $[\text{TP-OH}]_0/[\text{VA-044}]_0/[\text{NVP}]_0 = 1/x/500$ ,  $[\text{NVP}]_0 = 4.68 \text{ M}$  in DI water at  $40^\circ \text{C}$ , when (a)  $x = 5$  and (b) 20.

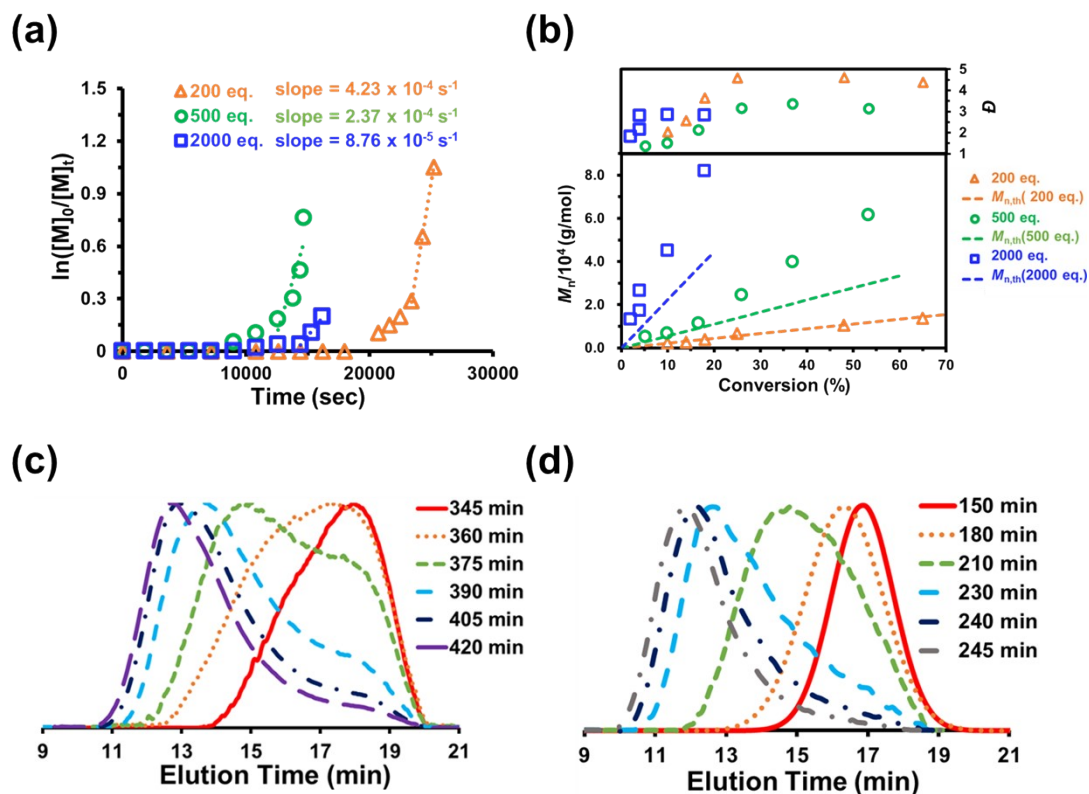

**Figure S3** The *NVP* polymerization mediated by **TP-OH** under the condition of  $[\text{TP-OH}]_0/[\text{VA-044}]_0/[\text{NVP}]_0 = 1/10/x$ ,  $x = 200, 500$ , or  $2000$ ,  $[\text{NVP}]_0 = 4.68 \text{ M}$  in DI water at  $40^\circ \text{C}$ . (a) The first-order kinetic plots. (b) The plots of  $M_n$  and polydispersity *versus* *NVP* conversion. The GPC traces of *NVP* polymerization when (c)  $x = 200$  and (d) 2000.



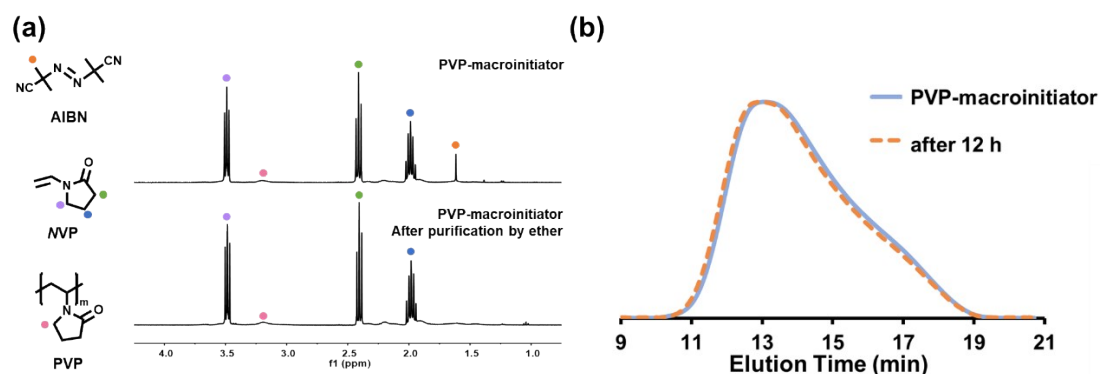

**Figure S4** (a) <sup>1</sup>H NMR spectra of PVP-macroinitiator before purification (upper one) and after purification (lower one). (b) The GPC traces of chain extension from PVP-macroinitiator (conditions:  $[\text{TP-OH}]_0/[\text{AIBN}]_0/[\text{NVP}]_0 = 1/10/500$ ,  $[\text{NVP}]_0 = 4.68 \text{ M}$  in DI water at  $60^\circ\text{C}$ , with conversion = 16% in 4 h,  $M_n = 11200 \text{ g/mol}$ ,  $D = 4.27$ ) to NVP without AIBN for 12 h (conversion = 0%,  $M_n = 11900 \text{ g/mol}$ ,  $D = 4.27$ ) under the conditions of  $[\text{PVP-macroinitiator}]_0/[\text{NVP}]_0 = 1/1000$ ,  $[\text{NVP}]_0 = 4.68 \text{ M}$  in DI water at  $60^\circ\text{C}$ .

## 10. The control study for the NVP polymerization

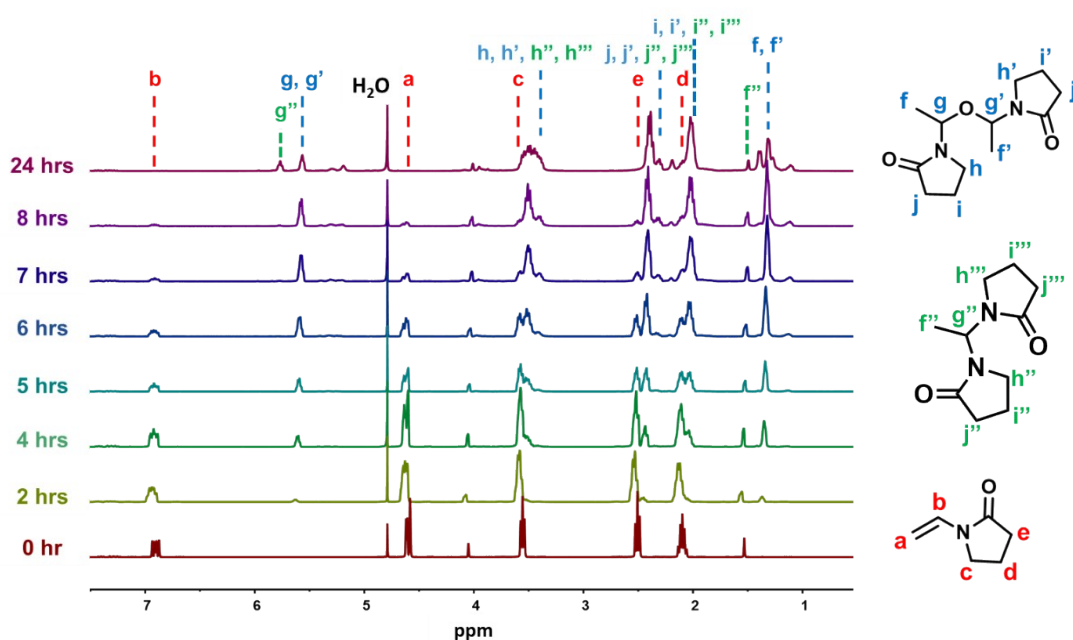

**Figure S5** Time-dependent  $^1\text{H}$  NMR spectra of reaction product for the *NVP* polymerization mediated by **TP-OH** with V-501 as an initiator under the condition of  $[\text{TP-OH}]_0/[\text{V-501}]_0/[\text{NVP}]_0 = 1/1/60$ ,  $[\text{NVP}]_0 = 2.34 \text{ M}$  in  $\text{D}_2\text{O}$  at  $60^\circ\text{C}$ .

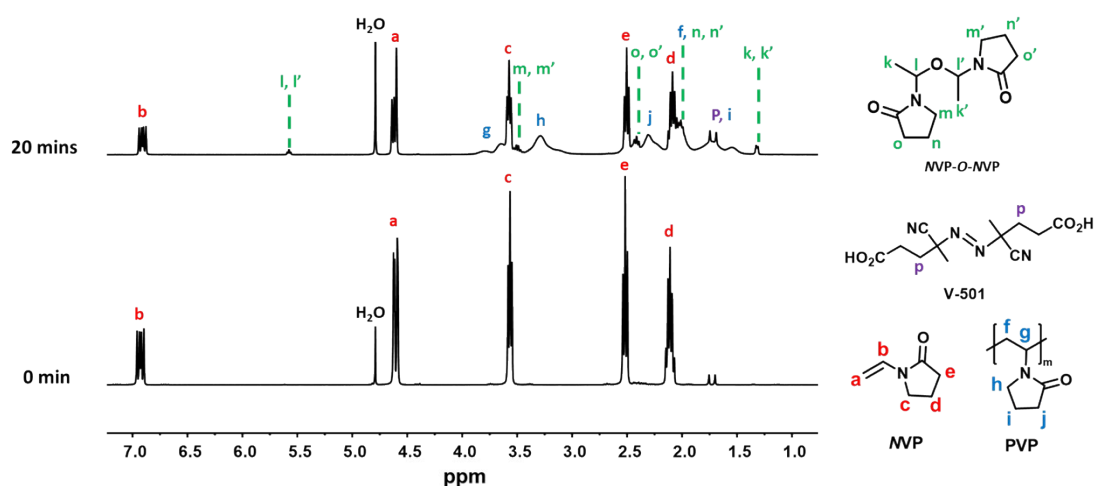

**Figure S6** Time-dependent  $^1\text{H}$  NMR spectra of reaction for the *NVP* polymerization with V-501 as an initiator under the condition of  $[\text{V-501}]_0/[\text{NVP}]_0 = 1/60$ ,  $[\text{NVP}]_0 = 2.34 \text{ M}$  in  $\text{D}_2\text{O}$  at  $60^\circ\text{C}$ .

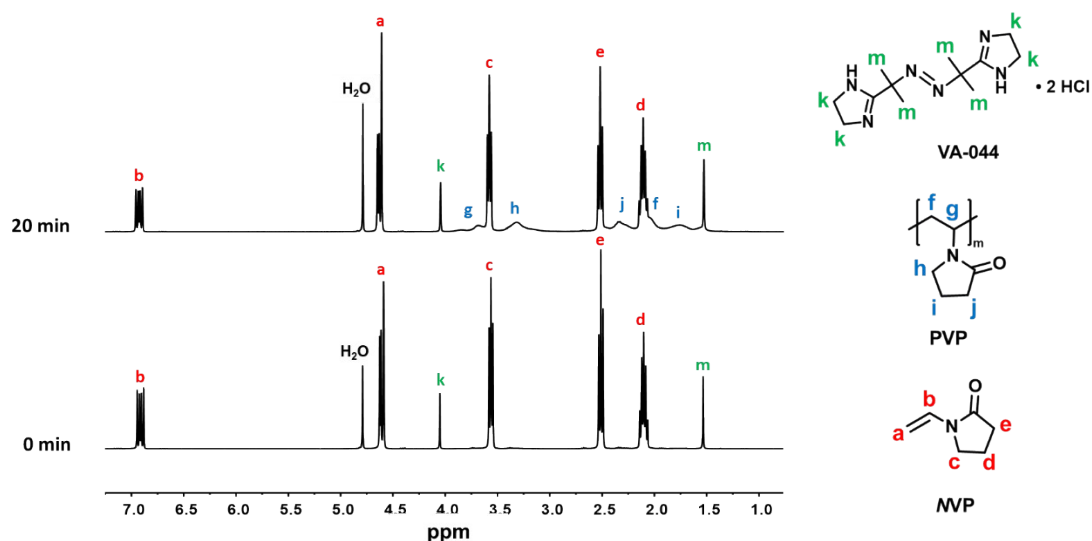

**Figure S7** Time-dependent  $^1\text{H}$  NMR spectra of reaction for the *NVP* polymerization with VA-044 as an initiator under the condition of  $[\text{VA-044}]_0/[\text{NVP}]_0 = 1/50$ ,  $[\text{NVP}]_0 = 2.34 \text{ M}$  in  $\text{D}_2\text{O}$  at  $60^\circ\text{C}$ .

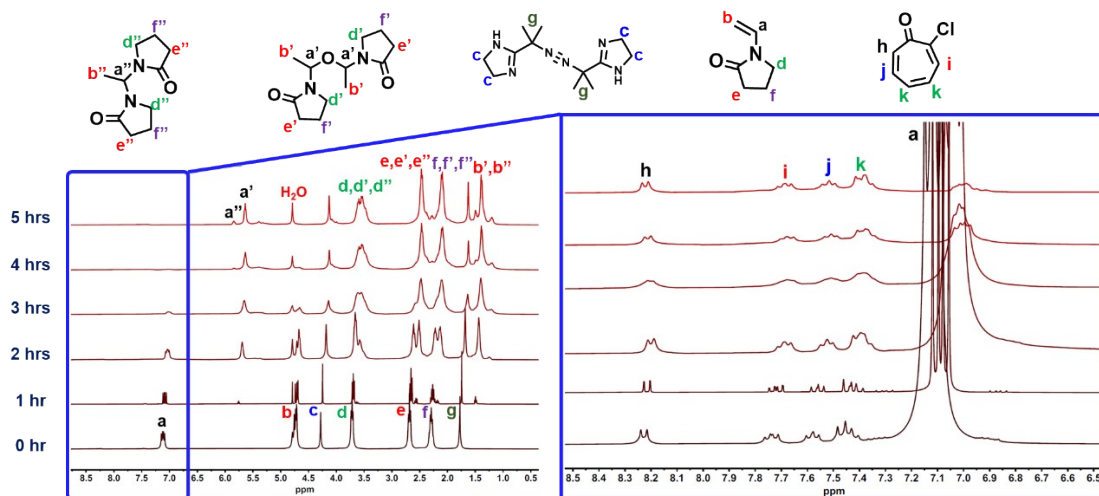

**Figure S8** Time-dependent  $^1\text{H}$  NMR spectra of reaction product for the *NVP* polymerization mediated by **TP-Cl** under the condition of  $[\text{TP-Cl}]_0/[\text{VA-044}]_0/[\text{NVP}]_0 = 1/5/50$ ,  $[\text{NVP}]_0 = 4.68 \text{ M}$  in  $\text{D}_2\text{O}$  at  $40^\circ\text{C}$ .

## 11. First-order kinetic plots for the monomer scopes in the TP mediated radical aqueous polymerization

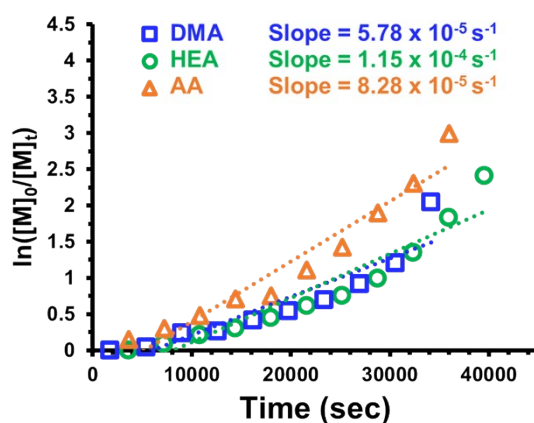

**Figure S9** The first-order kinetic plots of DMA, HEA, and AA polymerizations mediated by **TP** under the condition of  $[\text{TP}]_0/[\text{VA-044}]_0/[\text{monomer}]_0 = 1/5/500$  in DI water at  $40^\circ\text{C}$ .

**(a)**

— PDMA-macroinitiator  
 $M_n = 15700$  g/mol,  $\bar{D} = 1.68$

- - PDMA-*b*-PDMA  
 $M_n = 104700$  g/mol,  $\bar{D} = 1.87$

Elution Time (min)

**(b)**

— PHEA-macroinitiator  
 $M_n = 49100$  g/mol,  $\bar{D} = 1.53$

- - PHEA-*b*-PHEA  
 $M_n = 119800$  g/mol,  $\bar{D} = 2.15$

Elution Time (min)

**Figure S10** The GPC traces of chain extension initiated by the PDMA-macroinitiator (conditions:  $[\text{TP}]_0/[\text{VA-044}]_0/[\text{DMA}]_0 = 1/5/200$ ,  $[\text{DMA}]_0 = 2.15$  M in DI water at 40 °C, with conversion = 13%) or PHEA-macroinitiator (conditions:  $[\text{TP}]_0/[\text{VA-044}]_0/[\text{HEA}]_0 = 1/5/200$ ,  $[\text{HEA}]_0 = 1.93$  M in DI water at 40 °C, with conversion = 12%) under the condition of  $[\text{macroinitiator}]_0/[\text{monomer}]_0 = 1/1000$ , in DI water at 40 °C, with either (a) DMA or (b) HEA as the monomer.

Mass spectrum of the  $[111.0922 + n(111.0684) + 110.0606 + 106.0419 + 1.0073]^+$  ion. The x-axis is  $m/z$  (500 to 1200) and the y-axis is Intensity (a.u.) (0 to 12000). The spectrum shows a series of peaks with labeled  $m/z$  values: 550.3330, 661.7900, 772.9977, 884.3075, 995.6272, 1106.9128, 111.4570, 111.9070, 111.2077, 111.4570, 111.2635, 110.9441, 111.7131, 111.2294, 1037.1546, 1148.3840, 703.2337, 814.4972, 925.4415, 111.3098, 111.3197, 111.2856. Chemical structures are shown above the spectrum: a red structure on the left and a blue structure on the right, both with their respective fragmentation equations.

**Figure S11** MALDI-TOF MS spectra for the PVP polymer obtained from the

polymerization under the condition of  $[\text{TP}]_0/[\text{VA-044}]_0/[\text{NVP}]_0 = 1/5/500$ ,  $[\text{NVP}]_0 = 4.68 \text{ M}$  in DI water at  $40^\circ\text{C}$ . The polymerization was stopped in 615 mins with the conversion = 27% and  $M_n = 50500 \text{ g/mol}$ .

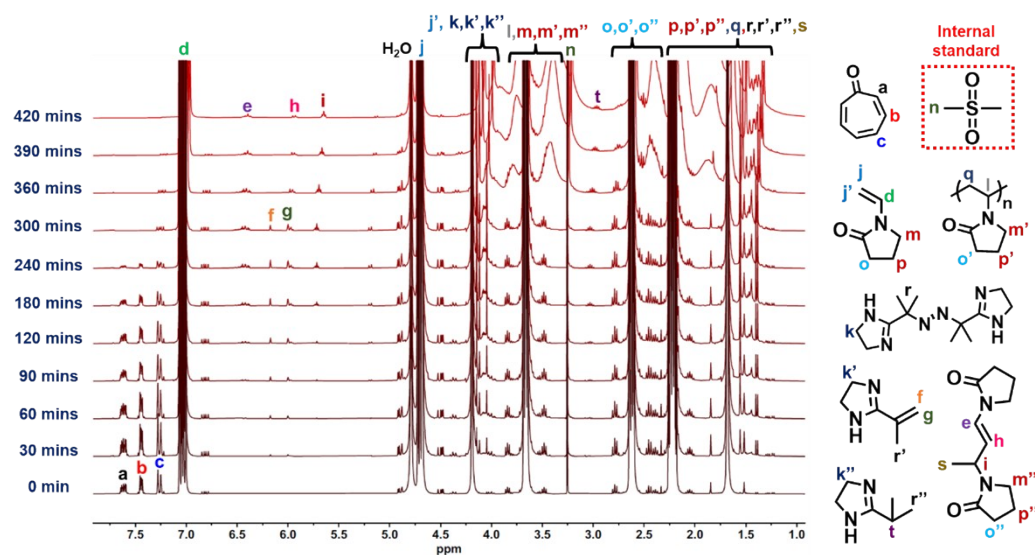

**Figure S12** Time-dependent  $^1\text{H}$  NMR spectra of reaction product for the NVP polymerization mediated by TP with dimethyl sulfone as the internal standard under the condition of  $[\text{TP}]_0/[\text{VA-044}]_0/[\text{NVP}]_0 = 1/5/50$ ,  $[\text{dimethyl sulfone}]_0 = 0.0331 \text{ M}$ ,  $[\text{NVP}]_0 = 3.10 \text{ M}$  in  $\text{D}_2\text{O}$  at  $40^\circ\text{C}$ .

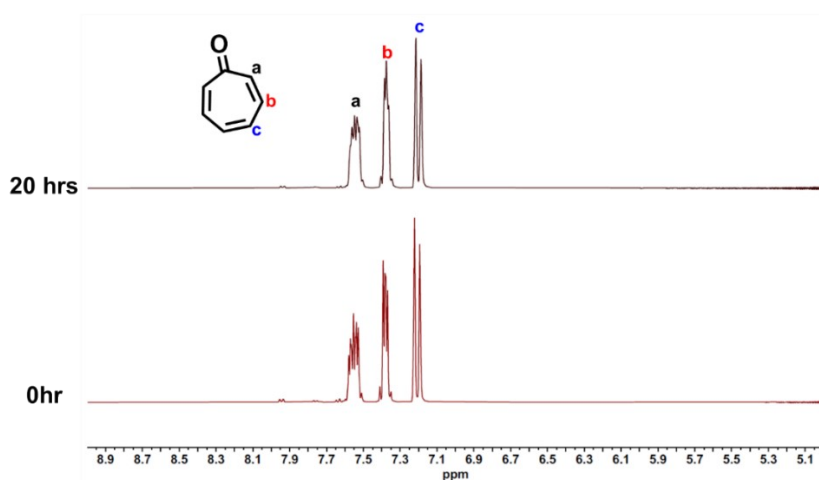

**Figure S13** Time-dependent  $^1\text{H}$  NMR spectra of TP and HCl solution,  $[\text{TP}]_0 = 0.1835 \text{ M}$  and  $[\text{HCl}]_0 = 0.0059 \text{ M}$  in  $\text{D}_2\text{O}$  at  $40^\circ\text{C}$ .

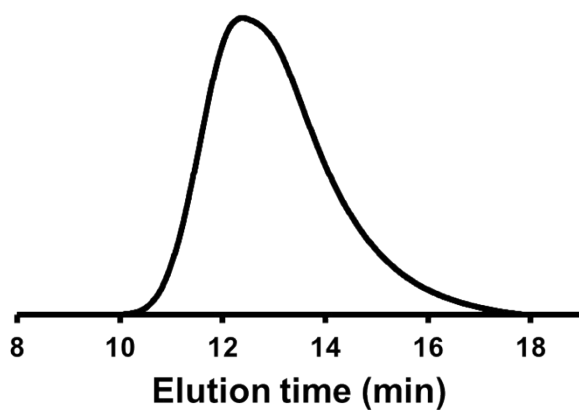

**Figure S14** The GPC traces of PVP obtained from the model reaction under the conditions of  $[\text{TP}]_0/[\text{VA-044}]_0 = 1/2$  ( $[\text{TP}]_0 = 0.093 \text{ M}$ ) in  $\text{D}_2\text{O}$  at  $40^\circ\text{C}$  for 24 hours. Subsequently, 100 eq. of NVP ( $[\text{NVP}]_0 = 4.66 \text{ M}$ ) were added into the reaction mixture and the reaction was continued at  $40^\circ\text{C}$ .

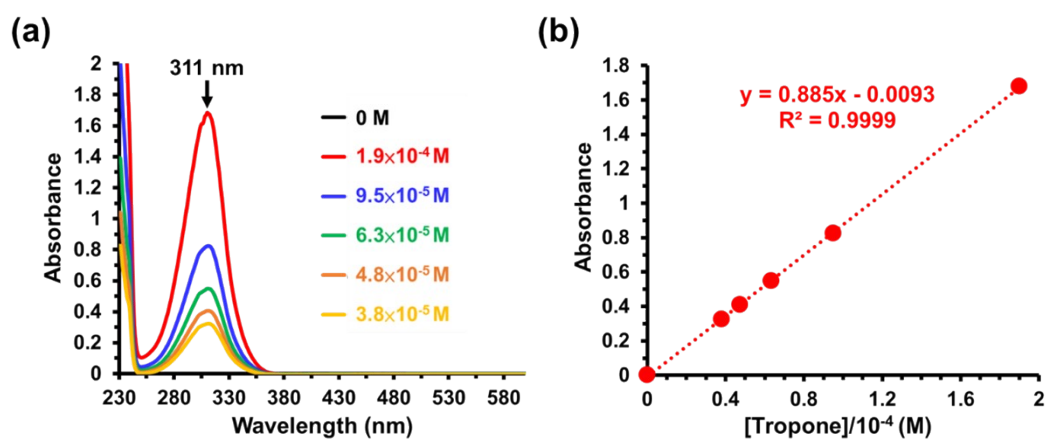

**Figure S15** (a) UV/vis spectrum of TP. (b) The calibration curve of UV/vis spectrum of TP in aqueous.

**Table S1** The data of the **TP** calibration curve for UV/vis spectrum.

| [Tropone] (M)        | Absorbance |
|----------------------|------------|
| 0                    | 0          |
| $1.9 \times 10^{-4}$ | 1.678      |
| $9.5 \times 10^{-5}$ | 0.824      |
| $6.3 \times 10^{-5}$ | 0.549      |
| $4.8 \times 10^{-5}$ | 0.408      |
| $3.8 \times 10^{-5}$ | 0.325      |

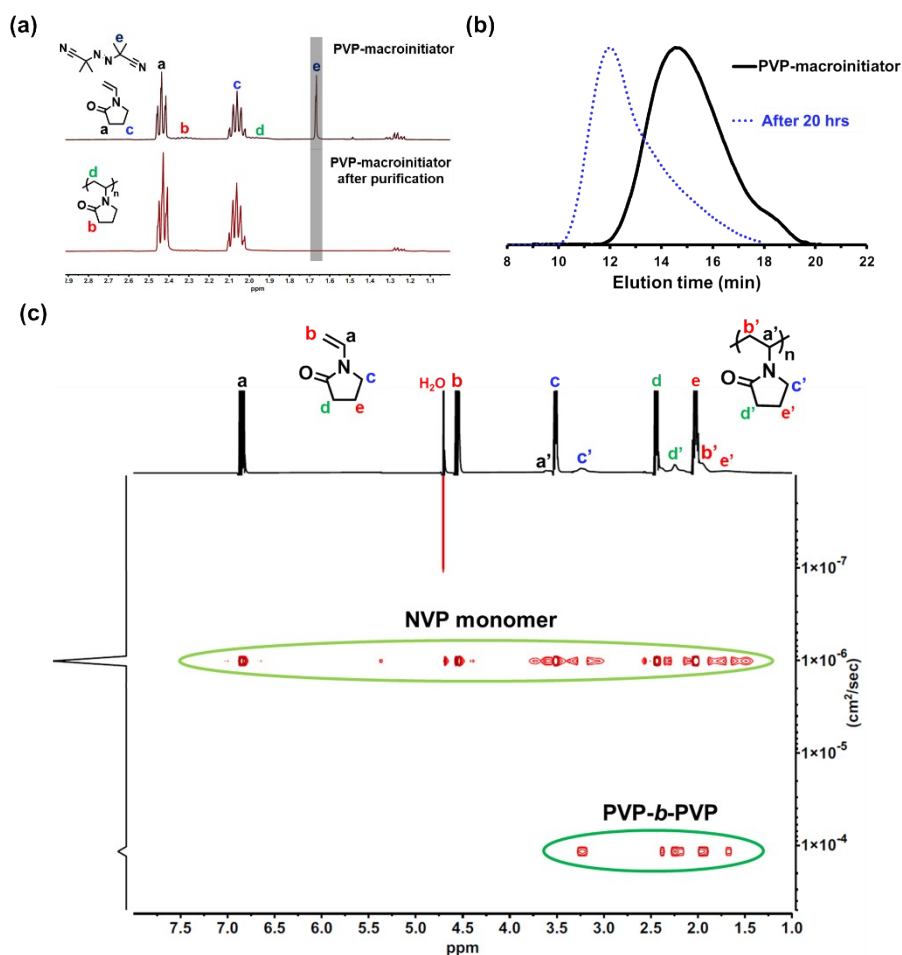

**Figure S16** (a) <sup>1</sup>H NMR spectrum of PVP-macroinitiator before purification (upper one) and after purification (lower one). (b) The GPC traces of chain extension from PVP-macroinitiator (conditions:  $[\text{TP}]_0/[\text{AIBN}]_0/[\text{NVP}]_0 = 1/10/200$  in bulk at 60 °C,

with conversion = 17% in 210 mins,  $M_n = 8600$  g/mol,  $D = 2.57$ ) to NVP without AIBN for 20 hours (conversion = 8%,  $M_n = 50500$  g/mol,  $D = 2.75$ ) under the conditions of  $[PVP\text{-macroinitiator}]_0/[NVP]_0 = 1/3000$  in bulk at 60 °C. (c) The DOSY-NMR spectra of PVP-*b*-PVP block copolymer in D<sub>2</sub>O.

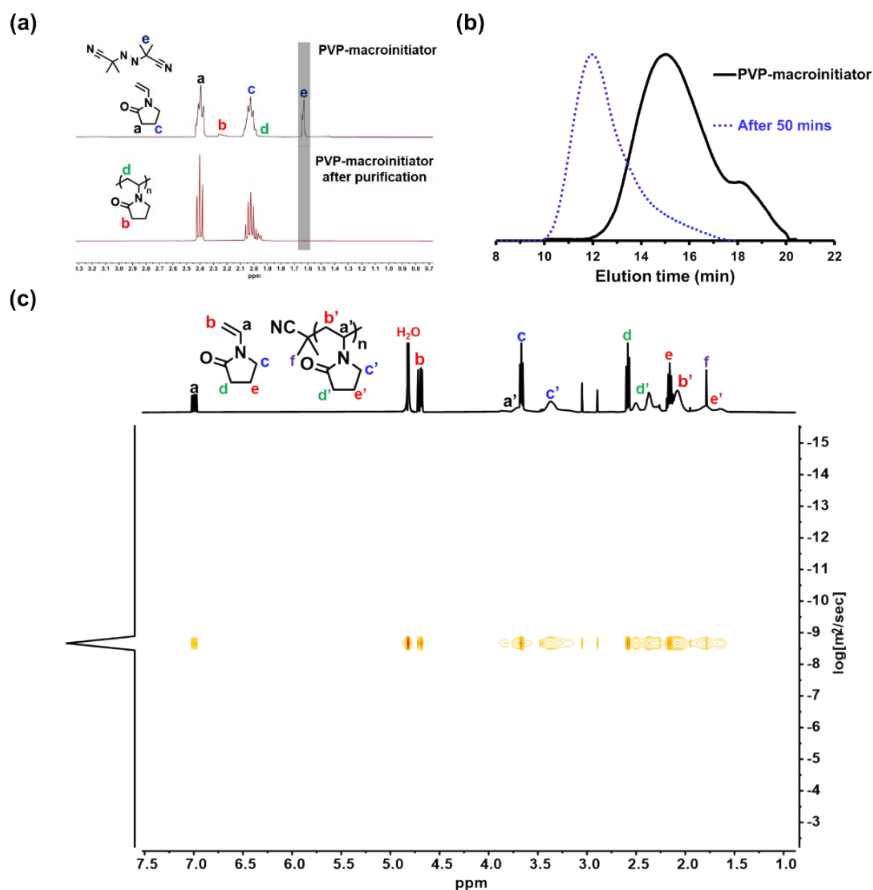

**Figure S17** (a) <sup>1</sup>H NMR spectra of PVP-macroinitiator before purification (upper one) and after purification (lower one). (b) The GPC traces of chain extension from PVP-macroinitiator (conditions:  $[TP]_0/[AIBN]_0/[NVP]_0 = 1/10/200$  in bulk at 60 °C, with conversion = 8% in 180 mins,  $M_n = 6600$  g/mol,  $D = 2.59$ ) to NVP with AIBN for 50 mins (conversion = 16%,  $M_n = 54200$  g/mol,  $D = 2.86$ ) under the conditions of  $[PVP\text{-macroinitiator}]_0/[AIBN]_0/[NVP]_0 = 1/5/1000$  in bulk at 60 °C. (c) The DOSY-NMR spectra of PVP-*b*-PVP block copolymer in D<sub>2</sub>O.



## 14. Kinetic simulation

We employed dynamic Monte Carlo simulations<sup>1, 2</sup> to model the kinetics of *NVP* polymerization mediated by **TP** in aqueous solution, aiming to determine the activation rate constant ( $k_{\text{act}}$ ) and deactivation rate constant ( $k_{\text{deact}}$ ). The reactions included in the simulation, along with their corresponding rate constants, are listed below.

**Table S2** The reactions involved in the simulation and their respective rate constants.

| Reactions involved in the <i>NVP</i> polymerization mediated by <b>TP</b> and their rate constants |                                                                          |
|----------------------------------------------------------------------------------------------------|--------------------------------------------------------------------------|
| Initiation                                                                                         | $\text{VA-044} + \text{NVP} \rightarrow \text{NVP}^\bullet$              |
| $k \text{ (s}^{-1}\text{)}$                                                                        | $1.93 \times 10^{-5}$                                                    |
| Deactivation                                                                                       | $\text{PVP}^\bullet + \text{TP} \rightarrow \text{TP-PVP}$               |
| $k \text{ (M}^{-1}\text{s}^{-1}\text{)}^{\text{a}}$                                                | $1.85 \times 10^8 \sim 1.85 \times 10^9$                                 |
| Activation                                                                                         | $\text{TP-PVP} \rightarrow \text{PVP}^\bullet + \text{TP}$               |
| $k \text{ (s}^{-1}\text{)}$                                                                        | $1 \sim 10$                                                              |
| Termination                                                                                        | $\text{Radicals} + \text{Radicals} \rightarrow \text{Terminated chains}$ |
| $k \text{ (M}^{-1}\text{s}^{-1}\text{)}$                                                           | $2 \times 10^9$                                                          |
| Propagation                                                                                        | $\text{PVP}_n^\bullet + \text{NVP} \rightarrow \text{PVP}_{n+1}^\bullet$ |
| $k \text{ (M}^{-1}\text{s}^{-1}\text{)}^{\text{b}}$                                                | 8243                                                                     |

Condition:  $[\text{TP}]_0/[\text{VA-044}]_0/[\text{NVP}]_0 = 1/10/500$ ,  $[\text{NVP}]_0 = 4.68 \text{ M}$  in DI water at  $40^\circ\text{C}$ . <sup>a</sup>The deactivation rate constant was calculated using the equation  $k_{\text{deact}} = k_{\text{act}} \times K_{\text{eq}}$ , where  $K_{\text{eq}} = 1.85 \times 10^8 \text{ M}^{-1}$ . <sup>b</sup>The propagation rate constant of *NVP* was obtained from reference.<sup>3</sup>

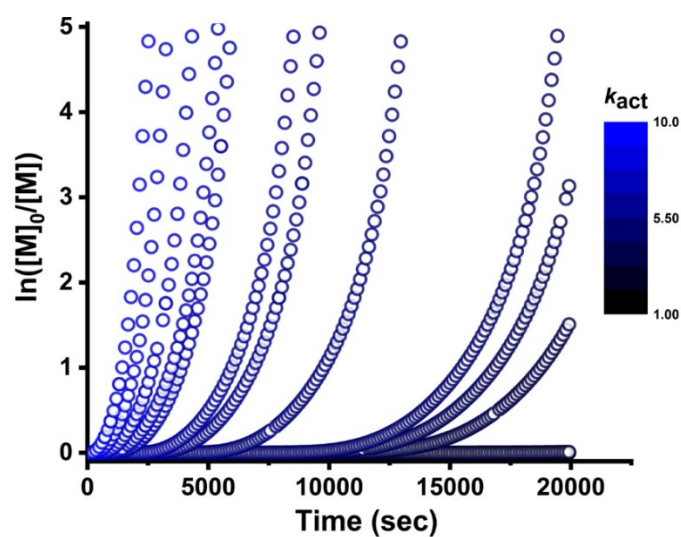

**Figure S18** The first-order kinetic plots were simulated using the dynamic Monte Carlo method with the parameters listed in Table S2.

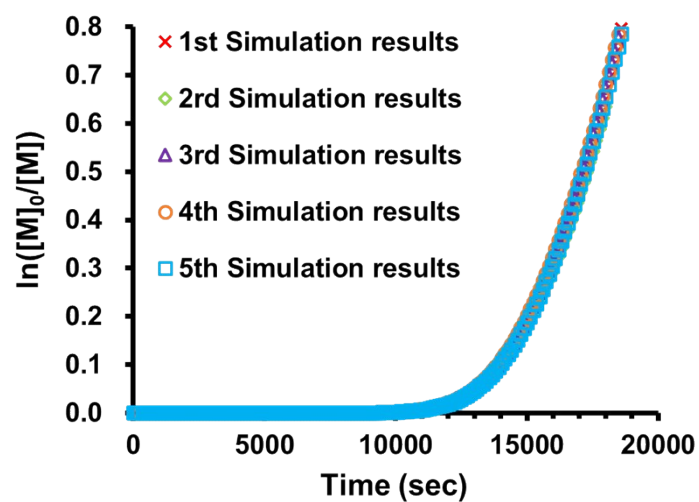

**Figure S19** The first-order kinetic plot of repeating the simulation five times.

## 15. References

1. M. Al-Harthi, J. B. Soares and L. C. Simon, *Macromol. React. Eng.*, 2007, **1**, 95-105.
2. D. T. Gillespie, *J. Comput. Phys.*, 1976, **22**, 403-434.
3. L. Uhelská, D. Chorvát, R. A. Hutchinson, S. Santanakrishnan, M. Buback and I. Lacík, *Macromol. Chem. Phys.*, 2014, **215**, 2327-2336.
